# Supplementary material for: Review of the genus Microlaimus de Man, 1880 with an illustrated guide for species identification
Source: PeerJ. 2025 Jul 29;13:e19611. doi: 10.7717/peerj.19611 (PMC12315829; doi:10.7717/peerj.19611)
Supplement: Supplemental Information 1 — The rows correspond to the valid species of the genus Microlaimus and the columns summarize the main taxonomic characteristics used to distinguish the species. [file peerj-13-19611-s001.xlsx]

## Sheet: Lista de Espécies Válidas
Group	Subgroup	Species (85)	de Man's ratio a	de Man's ratio b	de Man's ratio c	Outer labial setae	Cephalic setae	CS length/hd	Amph ant/hd (males)	amph%	spicule/cbd	c'	hypodermal glands - pores - setae	precloacal supplement - setae	Additional comments
1	-	M. acicularis	♂26-27 ♀22-23	♂5.3-5.7 ♀4.9-5	♂7.1-7.7 ♀6.5-6.7	PS	S	0.14	0.7	♂54% ♀38%	6.2	♂ 4.7 ♀ 5.1	x	x
		M. capillaris	♂21-22 ♀20	♂4.9-5 ♀5.1	♂5.8-6.8 ♀6.9	P	S	0.28	0.8	37.5%	5.2	3.9	x	x
		M. inermis	♂31.4	♂9.9	♂18.3	P	S	0.76	0.3	0.52	3.5	2.7	x	x
		M. karachiensis	♂23.4 ♀19.5	♂6.3 ♀4.8	♂7 ♀7.3	P	S (2 µm)	0.28	0.7	0.29	4.2-4.7	3.7	x	1 precloacal seta	Spicules with different sizes.
		M. korari	♂18-22 ♀19	♂4-5 ♀5	♂♀8	P	S (2 µm)	0.15	1.1	♂38% ♀29%	4.4	3.5-3.9	x	2 subventral rows of short, stout somatic setae observed in precloacal region	Annulated cuticle with faint longitudinal bars
		M. tenuispiculµm	♂26-26.5 ♀24-25	♂5.6-6.2 ♀6-6.2	♂7-7.5 ♀6.5-6.8	PS	S	0.4	1.8	0.33	2.8	5	x	x
2	-	M. minutissimus	♂17-29.2 ♀11.6-17	♂4-4.3 ♀3.2-5	♂5.8-7.3 ♀5.6-6.5	PS	S (1.5-2 µm)	0.4	3.5 (3.5-5.2)	♂56-64% ♀41-57%	1.2-1.5	3.2.-6.2 (elongated conical tail)	x	x
		M. nanus	♂ 24-26 ♀23-24.5	♂5.5-5.7 ♀5	♂5.8-6.8 ♀7.2-7.8	PS	S	0.4	1.6-1.7	0.4	1.2	4.2-4.9	x	x
3	-	M. annelisae	♂41.5-46 ♀36.5	♂9.1-11 ♀9.4	♂10.2-13.7 ♀10.9	P	S (9 µm)	1	1.4 -1.6	♂80% ♀57%	1.2-1.3	4.6-5.6	x	1 short precloacal seta
		M. decoratus	♂37.5-54.2 ♀35-42.8	♂10.4-11.8 ♀11.7-12.6	♂ 13.3-15 ♀10.5-15	P	S (3-6 µm)	0.51*	1.25	♂47%* ♀38%*	1.3-1.7	3.3	x	2 short precloacal setae
		M. falciferus	♂31-35.6 ♀24.5-27	♂7.5-8 ♀6.7-7	♂ 8.4-8.9 ♀8.8-9.9	S	S (18-19 µm)	1.5	0.8 (0.7-0.8)	♂33-45% ♀30-36%	1.2 - 1.3)	3.9-4.2	4 sublateral rows consisting of small pores alternating with short setae	One small spine anterior to cloacal opening and two small tubular precloacal supplements. Ventral precloacal cuticle thickened	Two sublateral setae located ca 1.5 abd anterior to cloacal opening. Lateral alae (consisting of lateral elevation of transverse striae with some interdigitation in posterior region) extending from posterior edge of pharyngeal bulb to halfway down tail.
		M. ostracion	♂42-45 ♀28-38	♂7.7-8.7 ♀6.5-7.8	♂9.9-11.5 ♀10-10.5	S (3 µm)	S (17 µm)	1.1	1.1	0.33	0.9	5	x	1 precloacal seta	Original description with juveniles only. Male and female described by Jensen (1979)
		M. punctulatus	♂♀16-23	♂ ♀6-7	♂♀10-13	S	S	0.42*	1.6*	40-65%	0.67-0.75	2.5	x	x	Cuticle ornamented with 3-4 rows of delicate dots
		M. tongaensis	♂18 ♀14	♂4 ♀4	♂8 ♀7	P	S	0.13	0.25	♂58% ♀47%	1.25	3-3.1	x	x
4	4A	M. abebei	♂25.8-35.2 ♀27.2-29.4	♂5.3-6.3 ♀5.6-6.2	♂7.3-8 ♀7.5-7.6	S	S	0.25	0.5	♂ 57% ♀ 50%	2.0-2.3	♂ 3.8-5.7 ♀ 5.3-5.5	x	x	External labial and cephalic setae almost the same size.
		M. acinaces	♂ 29-38.5 ♀25	♂6.5-11 ♀6.5	♂11.9-15 ♀10.3	S (2-2.5 µm)	S (11-12 µm)	0.85-0.92	0.76 - 0.85 (60-75%)	57-61% (58-65%)	0.8-1.3	3-5.5	2 subventral rows of pre-clocal cuticularised ducts which emanate from subcuticular glands.	4 small papiliform precloacal suplements (3-6 papillae + setae)	Male with caudal setae in two subventral rows. In the redescription by Jesen (1978), the amphid distance in males ranges from 1-1.1x hd.
		M. amphidius	♂ 32.1-39.4 ♀ 23.8-29.2	♂7-9 ♀6.9-7.3	♂9-11.3 ♀7.7-8.8	S (4 µm)	S (9 µm)	0.6	0.7	♂ 100% ♀ 30%	1.1-1.2	3-4	x	2 pores, 1 precloacal seta
		M. bahari	♂16-19.1	♂4.7-4.8	♂6.1-6.9	P	S	0.11	0.5	♂ 50%	1.9-2	3.3-3.9	x	x
		M. borealis	♂24 ♀21	♂5.7 ♀6.3	♂♀11	P	S	0.72	1	0.5	1.4	3.4	x	x
		M. capitatus	♂21-28 ♀21-22	♂7.9-8.7 ♀7.6-8	♂9.3-11.8 ♀8.5-9	P	S	0.35–0.45	0.7	50%* holotype (45-50%)	1.4-1.6	♂ 3.2-4.1 ♀ 4.7-5.4	x	x
		M. gerlachi	♂35 ♀28.6-43.2	♂15 ♀9.2-12.1	♂15 ♀14.3-17.7	PS	S	0.65	0.85	♂ 50% ♀ 44%	1.1	3-3.3	x	1 precloacal seta, delicate precloacal cuticular elevations	10 postanal setae present
		M. lunatus	♂♀39.4-41	♂♀8.3-8.4	♂♀14.1-14.4	S	S	0.49*	0.84*	♂ 67% ♀ 40%	1.7+L23+M+M35	3.5*	x	5 tubular precloacal supplements	Tail with 6 pairs of subventral setae
		M. nympha	♂25.3-27.8 ♀19.1-22	♂5.4-5.9 ♀5.4-5.6	♂6.6-7.8 ♀6.8-7.6	P	S (1.5 µm)	0.25	0.5	♂ 87% ♀ 54%	1.2	5	x	x
		M. papillatus	♂44	♂7	♂11.3	S (5 µm)	S (8.5 µm)	0.5	0.5	62%*	1.3	4.2	x	6 precloacal papillae, 1 precloacal seta
		M. paraborealis	♂28-38	♂7.4-10	♂9-10.3	S	S	0.74	0.9	50-60%	1	4	x	x	Drawing used was based on Gerlach, 1950.
		M. paraconothelis	♂27.6-31.1	♂7.9-8.3	♂11.7-12.4	S (3-3.5 µm)	S (7.6-8 µm)	0.92	0.7	51-54%	1.3	2.4-2.5	x	12-13 small supplements connected with intracuticular channels
	4B	M. arenicola	♂24.2 ♀23.7	♂7 ♀5.7	♂7.6 ♀8.2	S (2.5 µm)	S (5 µm)	0.31	about 0.5	♂ 44% ♀ 38%	0.875	4-4.1	x	x	Information and drawings from Blome (1982). Original description without drawing of the tail, drawing of the head and spicule is very similar to the redescription. Both descriptions indicate the spicules as weakly cuticularized and curved.
		M. campiensis	♂20.8-23.5 ♀14.2-16.7	♂5.7-6.1 ♀4.7-5.6	♂8.5-9 ♀7-9.4	P	S	0.3-0.6	0.9 (0.7-1)	26-37%	1.1-1.4	2.6-3.2	x	7 precloacal papilliform supplements
		M. crassipens	♂35-47	♂7-7.5	♂10.6-12.2	PS	S (7.5 µm)	0.33	0.33	48.5%	0.8-1	4	x	x
		M. discolensis	♂15.2-18.7 ♀15.3-16.8	♂6.6 ♀5.4-6.3	♂8.5-10.6 ♀8.0-10.7	S (similar length to C.S.)	S	0.55	0.9	46%*	1.3	2.4	4 submedian rows of hypodermic glands associated with large and numerous pores	x
		M. falklandiae	m.i.	m.i.	m.i.	m.i.	S	0.23*	0.6*	0.4	1.1*	3.2*	x	precloacal row of low papillae like elevations of the cuticle (not illustrated)
		M. latilaimus	♂28.9	♂8.8	♂11.1	P	S	0.4*	0.44*	0.44	1.35*	3.3*	x	x	Secretory-excretory duct strongly swollen, opening at level of the lateral organs
		M. naidinae	♂22.9-25.2 ♀17-19.2	♂5.7-5.9 ♀4.8-4.9	♂10-11.3 ♀9.1-9.6	P	S (2.3 µm)	0.27	1	♂43% ♀41%	1.1	♂ 2.8 ♀ 4.5	x	2 precloacal papillae	Characteristic based on the drawing, as there is no information in the text
		M. obesus	♂17-21 ♀13-16	♂4.1-5.3 ♀4.1-5.1	♂6.2-7.1 ♀6.6-7.9	P	small and thin setae (1.2-1.5 µm)	0.15	0.85	♂40-50% ♀42-46%	2-2.2	3.2-4.1	x	x
		M. orientalis	♂25-29 ♀18-21	♂5.2-6.3 ♀4.8-5.2	♂8.7-10.3 ♀8.6-9.9	P	S (3-4 µm)	0.21-0.25	1-1.1	♂43-45% ♀38-42%	1.7-1.8	♂ 3.6-4.5 ♀ 3.6-5.5	x	x	Tail conico-cylindrical with cylindrical portion short.
		M. paraaffinis	♂20.4-22.8 ♀15.8-20.1	♂5.4-5.8 ♀5.3-5.7	♂7.0-7.5 ♀6.7-7.3	P	S (1.5-2.1 µm)	0.3-0.33	0.7-0.8	♂33-42% ♀33-38%	1.1-1.3	♂ 3.7-3.9 ♀ 3.8-4.4	x	x
		M. pavus	♂16-19.2 ♀14-19	♂4.5-5.5 ♀4.4-5.2	♂5.6-7.2 ♀5.1-6.7	P	S (about 1 µm)	0.1	0.8 (0.8-0.9)	45-50%	1.5-1.6	3-4.3 (elongated conical tail)	x	x
		M. pinguis	♂19.2 ♀12.3	♂6.6 ♀5.9	♂10.4 ♀12.3	S (2.5µm)	S (6.5 µm)	0.34	0.6	0.45	1.1	♂2.25 ♀2.6	x	x	Tail with 6 subventral setae
		M. sensus	♂23.3-35.1 ♀22.4-30.3	♂6.6-8.2 ♀5.6-7.0	♂8.4-9.8 ♀8.1-9.2	P	S (♂16 µm; ♀ 12 µm)	♂ 0.11* ♀ 0.78*	1*	♂42%* ♀40%*	1	♂4-4.6 ♀3.5-4	x	x	Tail with subventral setae
		M. vitorius	♂25-31.2 ♀18.4-25	♂8.4-9.8 ♀7.6-9.5	♂12-13.9 ♀9.5-13.5	P	S	0.5-0.7	0.5-0.8	♂52% holotype (♂37.5-53%♀32-44%)	0.9-1	♂2.4-2.9 ♀3.3-5	4 lateral rows of hypodermal glands associated with small pores	One precloacal seta and three small precloacal pores
		M. undulatus	♂23 ♀17.4	♂6.6 ♀5.6	♂8.3 ♀8.3	P	S	0.5	0.7	0.43	0.9	♂2.8 ♀4	x	x
5	5A	M. acanthus	♂31.3-36.7	♂7.4-8	♂9.9-10.7	P	S (5-6 µm)	0.4-0.5	1.1-1.8	♂67-75%	1-1.3	3.5-4.2	x	4 to 6 prominent precloacal supplements, each with a stout seta (3-4 µm)	Original description with drawing of 2 males, but does not choose holotype. Variation given in the text of the distance of the amphid in relation to the anterior end is from 1.1 to 1.8 hd, however the measurement obtained in the drawings is 1.1 and 1.6 hd.
		M. kaurii	♂27.1-35.7 ♀20.5-27.3	♂6.5-8.3 ♀6.7-7.7	♂8.8-11.1 ♀8.6-9.6	PS	S (6.5 µm)	0.52*	1.5*	♂64% ♀55%	1.3	4	x	1 precloacal seta	Tail with 6 subventral setae
		M. microseta	♂55 ♀37	♂8.6 ♀6.3	♂14.2 ♀10.1	P	S	0.25	1.1	♂57% ♀50%	1.2	♂4.3 ♀5	x	x
		M. modestus	♂17 ♀12-16	♂4 ♀4.1-4.4	♂6-7 ♀6-9	P	S (2 µm)	0.22-0.25	1.1-1.2	♂55-57% ♀50-60%	2-2.3	♂3 ♀3-4	x	x
		M. monstrosus	♂59	♂10.6	♂12.4	P	S	1.2	1.1	♂100%	1.1	5	x	x
		M. parviporosus	♂30.2 -25.9 ♀20.2-25	♂4.6-5.2 ♀4.9-5.6	♂7.3- 8.3 ♀8-8.8	PS (1.2 µm)	S (same length as the outer labial setae)	0.12	1.6	♂55-67% ♀44-56%	1.5	3.9-6	4 submedian rows of pores along the body	x
		M. pwani	♂ 45.5-53.3 ♀35.5-42.3	♂8.3-8.6 ♀7.5-8.4	♂11.7-13.0 ♀10.1	P	S (7-9 µm)	0.88	1.2	♂50-55% ♀42-50%	1.6-1.8	♂4.1-5.3 ♀5.1-5.9	x	x
		M. sergeevae	♂ 34.1-53.1 ♀25.5-38.3	♂10.9-13.1 ♀10.2-12.8	♂13.2-16.5 ♀12.1-14.5	P	S (7.5-9 µm)	0.9	1.4	♂53.3-68.1% ♀41.2-63.7%	1.1-1.4	♂3.2-4.3 ♀3.7-5.4	4 submedian rows of round pores	row of 8 precloacal supplements in the form of thin channels in the center of each papilla
	5B	M. africanensis	♂66-72.6 ♀44.3	♂9.6-10.9 ♀8.4	♂ 14.5-17.3 ♀17.7	S	S	0.51*	1.5* holotype (1.1-1.3 paratypes)*	33-46%	1.5*	♂4.6-5.2* ♀3.6*	hypodermal glands present (distribution pattern not described); few somatic setae	x	Two pairs of subventral setae on the tail of the male.
		M. brevis	♂14-18 ♀12-15	♂4.4-4.9 ♀3.9-4.4	♂ 7.4-8.7 ♀7.1-7.9	P	S (3.5–4.5 µm)	0.33	1.2 holotype (1-1.1 paratypes)	32–45%	about 1	2.7-3.5 (elongated conical tail)	x	x
		M. clancularius	♂21.7-21.6	♂5.8-6.1	♂7.2-8.3	S (2 µm)	S (5 µm)	0.36	1.2	30.5%	1.9	3.5	few sublateral pores associated with hypodermal glands	x
		M. cyatholaimoides	♂22-31 ♀20-23	♂6.8-7.8 ♀7-7.4	♂9.7-12.7 ♀10	P	S	0.4	1.5-1.7	38-39%	1.5	m.i.	4 rows of hypodermic glands associated with small setae	4 reduced pores
		M. globiceps	♂25-41 ♀24-35	♂6-8 ♀5.7-6.7	♂10-13 ♀6.7-8	P	S (2.5-3 µm)	0.21	1.5 (original description about 1 hd)	0.34	1.3	♂3.4 ♀5	x	x	Original description has no drawings or measurements. Drawing used based on Gerlach 1950.
		M. marinus	♂♀21-50.3	♂♀6.6-10.6	♂♀7.1-18.1	PS	S (5.6 µm)	0.44* holotype (0.5 redescription)	1.2* holotype (1.1 - 1.4)	♂37%* holotype (♂ 42-55% ♀ 35%)	0.74* (1 - 1.6)	♂3 ♀3.1-5.2	x	3 papillae and 1 precloacal seta	In parentheses, measurements obtained in redescriptions (De Coninck and Stekhoven, 1933; Gerlach, 1950; Bouwman, 1981; Blome, 1982). Original description does not have a tail drawing.
		M. oblongilaimus	♂21 ♀24	♂5.6 ♀5.4	♂7.7 ♀6.7	S (3 µm)	S (9 µm)	0.56	1.5*	43%*	1.4	3.5-4	x	x
		M. oblongilaimus	♂ 86	♂19	♂34.5	m.i.	not see	-	1.15*	40%*	1.5*	4.2*	x	6 precloacal elevations (papillae)	Total length of the row of pre-cloacal papillae is 120 µm.
		M. sicarius	♂26.4-30.2 ♀24.8	♂6.4-7.3 ♀6.2	♂9.4-9.5 ♀8.9	P	S (8-10 µm)	0.6	1.3	♂ 46% ♀ 40%	1	3.5-3.8	x	5 small precloacal papillae
		M. texianus	♂24.3-28 ♀23-28	♂6.3-7.8 ♀6.6-7.7	♂11.3-12.3 ♀9-10	P	S (4.5 µm)	0.45*	1.5*	33-40%	1.3	♂3-3.4 ♀3.1-4.5	x	5 papilliform - tubular	Original description with female only. Male described by Wieser, 1954.
		M. westindicus	♂22.9-26.6 ♀19.8-19.9	♂6.4-6.7 ♀5.4-5.5	♂8.3-9.2 ♀8.2-8.7	P	S (11.2-11.9 µm)	0.65-0.8	1.1-1.2	♂46% holotype (53%) ♀37-38%	1.7-1.5	♂3.7-3.9 ♀3.9-4.5	x	x
6	6A	M. aequisetosus	♂27.3-28.2 ♀26.4	♂5.9-6.1 ♀6.2	♂6.8-7.1 ♀6.8	S (similar length to CS)	S	0.3	about 1.7	0.5	1.1-1.25	♂5.3-5.5 ♀5.8	x	1 precloacal seta
		M. bathyalis	♂29-36.7 ♀23-34	♂5.3-6.2 ♀5-5.6	♂8-10.6 ♀8.2-11.3	PS	S (♂ 2-3 µm; ♀ 1.5-2 µm)	0.4-0.5	1.8-2.0	♂63-83% ♀50-71%	1.45-1.65	♂3.4-4.6 ♀3.7-5.1	x	Four small papilliform supplements
		M. dixiei	♂36.4 ♀25.6	♂10 ♀8.2	♂9.1 ♀8.2	P	S (6-8 µm)	0.7	1.8*	♂53 %* ♀43%*	1	♂4 ♀5.4	x	x
		M. honestoides	♂32.3-34.6 ♀22.8	♂6.8-6.9 ♀7.6	♂9.4-11.9 ♀10.3	P	S	0.67	1.6	0.5	1.2	3.5-3.6	x	x
		M. macrocirculus	♂♀15-24	♂♀5-6	♂♀8-12	S	S	0.47*	1.5 description (1.8* drawing)	52%*	1-1.3	3	x	x	Measurements given in the text, in relation to the distance from the amphid to the anterior end, clearly different from that observed in the drawing.
		M. paraglobiceps	♂21.9-29.5 ♀15.8-19.2	♂♀5.9-6.6	♂7.7-8 ♀6.4-6.8	P	S (3µm)	0.43	1.9 holotype (2.3 paratype)	♂60−66.7% ♀60-64.5%	1.5-1.7	♂4.2-4.3 ♀4.8-6.2	x	One precloacal pore, difficult to discern under light microscope and one precloacal setae 2 μm long	Holotype measurement used for group classification.
		M. validus	♂33-34 ♀24-29	♂7-7.4 ♀6.7-7.5	♂7.3-7.9 ♀7.2-7.8	S	S	0.25-0.33	1.6-2.0	♂75-81%	1-1.1	♂4.8-5.3 ♀5.3-5.8 (slender, elongate-conical tail)	x	x
	6B	M. cochleatus	♂30 ♀21.3	♂6.2 ♀7.2	♂7.2 ♀8.8	PS	S (10 µm)	0.77	1.8	30-33%	1.5	4.0-4.5	x	1 precloacal seta
		M. compridus	♂77 (♂57.8-65.3 ♀52.7-57.5)	♂12.1 (♂10.2-11.8 ♀10.5-12)	♂16.3 (♂14.1-15.6 ♀10.7-12.3)	P	S (5 µm)	0.5 (0.6)	2	♂46.4% holotype (45%)	1.3	♂4.7 (4.5) ♀6.5-7	(numerous cells in the pharyngeal region, but no pore is mentioned)	x	Drawing used based on Gourbault and Vinx 1988. Measurements from the original description (information from Gourbault and Vinx 1988).
		M. copulatus	♂18-20 ♀16-19	♂4.1-4.6 ♀4.4-4.6	♂6-7.2 ♀6.3-6.6	m.i.	PS (1µm)	0.17	1.8	0.4	2*	2.7-3.0*	x	1 papilliform supplement
		M. formosus	♂33 ♀27	♂7.1 ♀6.5	♂9 ♀8.3	PS	S (18 µm)	1.3	2	0.33	1.1	4-4.5	x	x
		M. honestus	♂22-35 ♀ 18-35.5	♂7-8 ♀7-9.8	♂9-12 ♀7.8-11.8	P	S	0.35	1.64 (little smaller than 2 in Gerlach 1950)	29-33% (33-40% - Gerlach, 1950)	about 1	♂3-4 (Gerlach, 1950) ♀5.6*	x	2 precloacal papillae	Drawing used based on De Conink and Schuurmans, 1933 (they did not observe ventral teeth or the pre-cloacal papillae mentioned in the original description, which has no drawing).
		M. limnophilus	♂22.8-29.3♀20-24.3	♂5.6-6.5 ♀5.4-6.6	♂7-8.8 ♀5.8-7.4	P	S (1.5 µm)	0.23-0.25	1.9	♂30-35% ♀30-33%	1.3	♂3.2-4.1 ♀3.9-5.9	x	2 pores + 1 precloacal seta
		M. nordestinus	♂42-58 ♀41.5-45	♂12.5-14 ♀11-14	♂13-15 ♀10-13	P	S (5-6 µm)	♂0.56-0.67 ♀0.75	1.9 holotype (1.6-2.1 paratype )	♂36-46% ♀36-42%	1.2-1.5	♂4-5 ♀6.5	4 sublateral, 2 subventral and 2 subdorsal rows of hypodermal glands. Pores and setae absent.	2 precloacal papillae
		M. paraundulatus	♂27-30.5 ♀26	♂5-6 ♀5.5	♂♀8	P	S (3 µm)	0.43	1.6	♂44% ♀56%	1.8-2.3	4.0-6.0	x	x
		M. ponticus	♂30-36.8 ♀39.4-41.2	♂7.9-11.3 ♀8.1-12.1	♂10.3-13.2 ♀11.8-11.9	S	S (5-7.5 µm)	0.5-0.8	1.7*	♂48%*(40-60%) ♀38-48%	0.8-1.2	3.1-3.9	x	x
		M. porus	♂21 ♀18.6-24.8	♂4.9 ♀4.8-6.7	♂5.4 ♀5.2-7.5	P	S (3 µm)	0.375	♂1.6	♀42%*	1.7	♂5.2-5.6 ♀6.9	4 submedian rows of pores**	x	In the drawings by Bussou, 1993 the head represented is that of a female. The redescription by Miljutina et al., 2009 only has females; (**) information obtained from the female paratype.
		M. zosterae	♂27-29.4 ♀27.4-36	♂6.7-7.2 ♀6.4-8.7	♂9.4-9.9 ♀8.2-9.2	PS	S	0.2	1.9	♂43-45% ♀34-39%	1.5*	♂3.6-3.8 ♀3.9-4	x	4 to 5 supplements in the form of fine cuticular canals, exiting through small elevations, 1 precloacal seta	Original description with female only. Drawing and measurements from redescription by Kovaljev and Tchesunov, 2005.
7	-	M. alexandri	♂33.2-41 ♀22.7	♂7-7.4 ♀7.3	♂11.5-13.6 ♀11.7	P	S	0.5-0.6	2.1 holotype (2.4 paratype)	♂100% ♀32%	1.4	3.1-3.9	x	x
		M. arenarius	♂29.7-31.2 ♀26.4	♂4.5-5.1 ♀5.2	♂6.1-6.2 ♀6.6	PS	S	0.7	3.6	♂55-60% ♀50%	1.1	5.2-5.4	x	x
		M. criminalis	♂♀ 37.5-40.5	♂7.5-7.9 ♀7.5-8.5	♂10.7-13.5 ♀9-11.1	S (2 µm)	S (6 µm)	0.75	2.25	0.5	1.15	3.5	x	x
		M. martinezi	♂18.9 ♀19.8	♂4.5 ♀4.7	♂5.1♀5.1	P	PS	x	3	0.54	1.7	♂5.5 ♀6.2	x	x
		M. minutus	♂18.9-20.7 ♀13.6-17.7	♂4.3-4.8 ♀3.8-4.3	♂4.9-7 ♀5.2-7.2	P	PS (short)	0.11	2.6	56-62%	1-1.7	♂3.5-4.7 ♀3-6	x	x
		M. parahonestus	♂29-35 ♀18	♂8.1-9.6 ♀7	♂8.8-9.6 ♀7.5	P	S	0.6	2.8	0.4	1.3	4.1	x	x
		M. tenuicollis	♂29.7-33 ♀26-29.6	♂5.3-6.5 ♀5.2-6.8	♂6.7-7.5♀7.2-8	PS	S (9 µm)	0.8 - 1	4.3-4.5	♂31% ♀25%	1-1.4	♂4-4.7 ♀5-5.6	x	x	Original description (Gerlach, 1952) only has female. The same author described male in 1953, but only has drawing of tail and spicule. Blome, 82 redescribed male and female.
			Abreviações
			(-) = not applied
			m.i.= missing information
			CS= cephalic setae
			hd= head diameter
			S= setiform
			P= papilliform
			PS= setiform labial papillae
			amph%= percentage of the amphidial fovea diameter in relation to corresponding body diameter
			Amph ant/hd= distance of amphidial fovea from anterior end in relation to head diameter
			CS length/hd = ratio of cephalic setae in relation to head diameter
			spicule/cbd= length of spicule along arc in relation to cloacal body diameter
			(x) = paremeter absent
			cbd= cloacal body diameter
			abd= anal body diameter
			* proportion obtained from the drawing
